# Supplementary material for: A new type of oxygen bridged CuII36aggregate formed around a central {KCl6}5−unit
Source: Royal Society of Chemistry journal article supplement (doi:10.1039/b403735a), 2004-01-01

A new type of oxygen bridged CuII36 aggregate formed around a central {KCl6}5- unit

Muralee Murugesu†, Rodolphe Clérac‡, Christopher E. Anson† and Annie K. Powell†*

Supplementary material: Temperature dependence of the magnetic suscpetibility for **1** (open circles) and **2** (open squares) from 300 to 0 K as a standard plot (top) and semi-log plot (bottom).


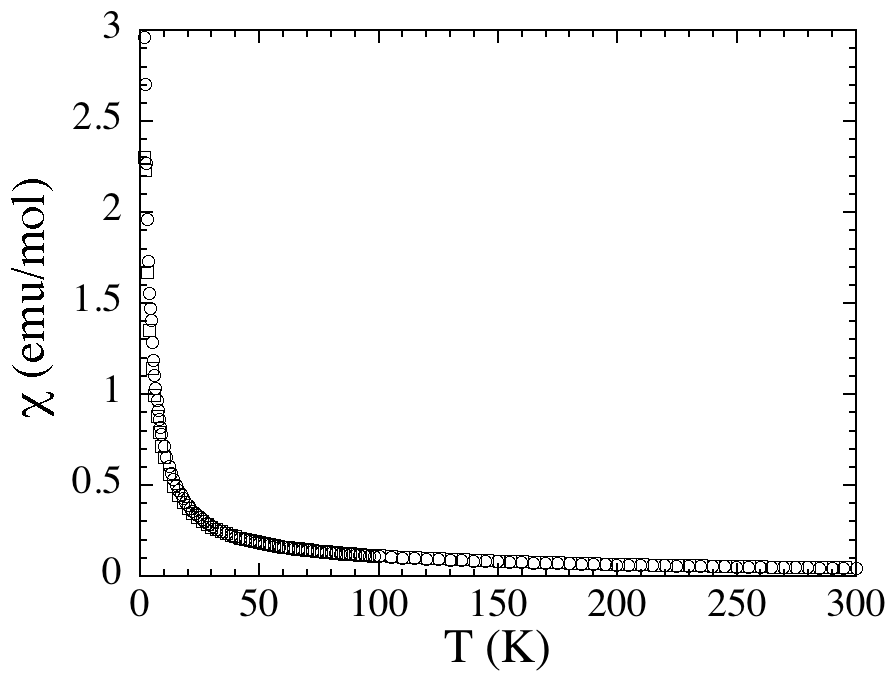


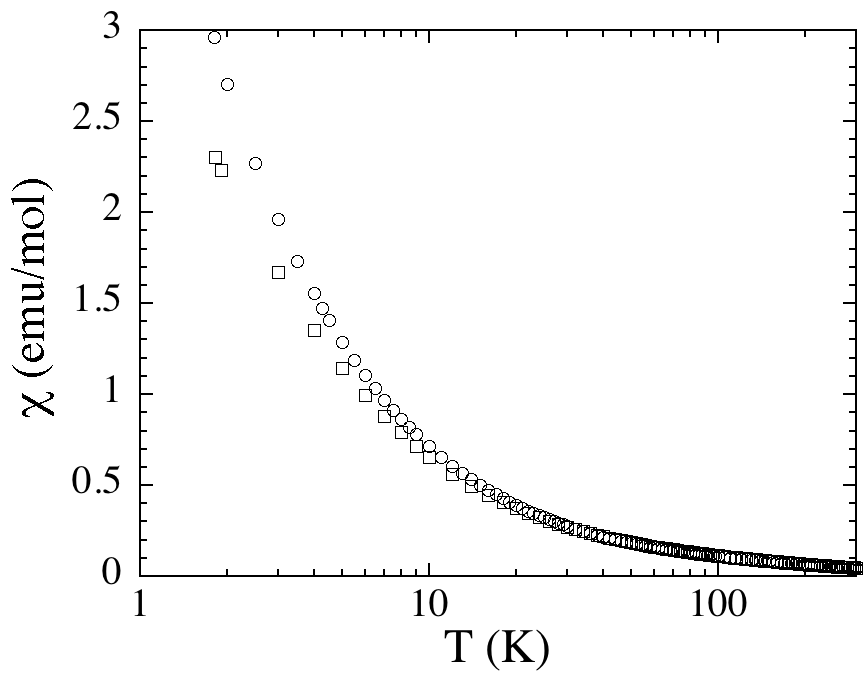

Supplement: b403735a-1.doc [file b403735a-1.doc]
